# Supplementary material for: The incidence of HIV and associated risk factors among pregnant women in Kabarole District, Uganda
Source: PubMed Central journal article supplement (PMC7274402; doi:10.1371/journal.pone.0234174), 2020-06-05
Supplement: pone.0234174.s002.pdf [file pone.0234174.s002.pdf]

**Study questionnaire-Rutooro version**

**OKUKAGUZIBWAHO HAKAHUKA KOMUNYWERERRO OMUBAKYARA ABAINI ENDA  
OMURUBUGA RWA FORT PORTAL- UGANDA**

Enamba yawe hairwarro linu \_\_\_\_\_ Ebiro byokwehandikisa \_\_\_\_\_

Enamba yawe habwokuseruliriza kunu \_\_\_\_\_

Ibara Lyogu arukukugaza \_\_\_\_\_

Ibara Lyawe \_\_\_\_\_

**Ebirukukwata hakukebeza enda**

Akehandikisa kwekebeza end hairwarro linu ?  ego  nangwa

Obukiraba ego, enda ina wiki zingaha: \_\_\_\_\_

Murundi gwakaingaha kukeberwa end kwiha nagitwara? \_\_\_\_\_

Rundi mukazi aizire kuzaara?  ego  nangwa obukiraba ego, ebirobyokuzarramu: \_\_\_\_\_

Emyaka yobukuru: \_\_\_\_\_ Enda yakaingaha: \_\_\_\_\_

Ebiro byokwezi yamalirire kukeberwa akahuka komunywererro kwiha natwara end: \_\_\_\_\_

Enda ekaba ina wiki zingaha: \_\_\_\_\_ Akahuka komunywererro kali karumu rundi nangwa:  karumu  nangwa

**Obuswezi:** aswirwe  wakacu  aliwenka  mufakati  akahukanana

**Okusoma:** atasome  wa puraimare  wa seniya  akamara kosi

**Omulimo:** mufumbo  mulimi  musubuzi  mukozi wa gafumenti  ebindi : \_\_\_\_\_

**Edini:** \_\_\_\_\_ **harukwikara:** Fort Portal  Other  , specify: \_\_\_\_\_

**Nikitwara bwirreki kuhika hairwarro:** \_\_\_\_\_

**nikitwara sente zingaha kuhika hairwarro (UGS):** \_\_\_\_\_

**Abantu aboine munju yawe:** \_\_\_\_\_ **abana abali hansi yemwaka 15 omunju yawe** \_\_\_\_\_

**Binu obine munju yawe?:**

Amasanyarazi ego  nangwa

Amaizi ga tapu ego  nangwa

Radio ego  nangwa

TV ego  nangwa

Friji ego  nangwa

Ente ego  nangwa

kabodi ego  nangwa

boda/pikipiki ego  nangwa

motoka ego  nangwa

Akatimba kemibu ego  nangwa

**Obirukukwataho omugonzibwa wawe** (ogu rwamutwekere enda)

Emyakaye: \_\_\_\_\_ Okasumi mwakamara hamu: \_\_\_\_\_

**Okusoma kwe:** atasome  waprimare  waseniya  wa kosi

**Omulimo arukukora:** mulimi/mulisa  musohi  musubuzi  mukozi wagavumenti  muvugi

webyokwerinda  Ebindi , soborra hantu \_\_\_\_\_

**Edini ye:** \_\_\_\_\_ **Harukwikara:** Fort Portal  Handi , soborra: \_\_\_\_\_

**Nomanya omusaija wawe obu araba aine akahuka komunywererro?**  ego  nangwa **Obukiraba ngu ego:**

akaine  nangwa

**Omusaija wawe akamalirra di kwekebeza (ebiro byokwezi)?** \_\_\_\_\_

tindikubimanya

**Mwarabalizeho ensonga yokwekebeza akahuka komunywererro?** ego  nangwa

**Omusaija wawe yarakusendekerizeho kakugenda mwirwarro kwekebeza akahuka komunywererro kwiha notwara**

**enda?** ego  nangwa

**Ekiraba ego, inyena mukakeberwa akahuka komunywererro kwiha notwara enda enu?** ego  nangwa

**Obukiraba nangwa, mwarayekebizeho akahuka komunywererro?** ego  nangwa

Obukiraba ego, mukakeberwa di (ebiro byokwezi) ? \_\_\_\_\_

## Okwetwaza kwawe

**Nuhurra oyeralikirire ngu nosobora kukwatwa akahuka komunywererro?** nyeralikerire muno  nyerlikirire kake  tinyeralikirire

**Obaire noterana nomusija kwiha notwara enda enu?**  ego  nangwa

Obukiraba ego, mukira kuterana emirundi ingaha buli mwezi: \_\_\_\_\_

Mukuterna nomusija mukozesa Kondomu ?  ego  nangwa

**Obukira ego, kondomu mukira kuzikozesa di?** Buli kuterana  dimunadimu  titukira kuzikozesa

Obukira nangwa, soboraho ensenga habwaki:

**Nomanya kukozeza kondomu?** ego  nangwa  **Nomanya hokwiha kondom?** ego  nangwa

**Wakaterana nbasaija baingaha: kiwiha omyaka nigutandika ?** \_\_\_\_\_ **kwiha notwara end?** \_\_\_\_\_

**Kwiha omwaka nigutandika, okabaho omubikorwa nkabinu:**

Kwetera emibazi yebitokoza obwongo  okwetunda  kuterana nousaija owotamanyire obwaraba aine akahuka komunywererro  okunywa ebitamiza nka amarwa  kuterana amazire kutamira amarwa/ebitokoza bwongo  kuterana nomusaoja atamire amarwa/ebitokoza bwongo  kuterana nomusaija omulingo gwebisiyaga

**Obukiraba ego, kibaberaho nkaha kandi hidi :** \_\_\_\_\_

**Warakwasirweho endwaire yona eyeruraba mukuterana kwiha notwara enda enu?**

ego  nangwa

Obukiraba ego, soboraho obwokuroraho bwendwaire egyo:

Obukiraba ego, okatungaho obujanjabi bwona omwirwarro? ego  nangwa

**Warakwasirweho oburwaire byomutwe bwona?** ego  nangwa

Obukiraba ego, soboraho endwaire enu: \_\_\_\_\_

**Kwetwaza kwomusaija wawe** (applies for husband/partner, or father of this baby)

## Result of client's HIV repeat test

**Repeat test performed during this session today**  **Result was positive**  **Result was negative**

**OR** (only if a repeat HIV test was performed already, at a time less than 3 months ago)

**Result transferred from hospital records**  **Date of repeat test** \_\_\_\_\_ /Gest. week \_\_\_\_\_

**Test result of transferred hospital records:** **Result was positive**  **Result was negative**

**If yes, please specify reason and frequency:** \_\_\_\_\_

**To your knowledge, does your partner ever** abuse alcohol  use intravenous drugs  visit sex workers

**If yes, please estimate frequency of events** \_\_\_\_\_

**Have you ever experienced physical violence by your partner?** Yes  No

**If yes, please specify frequency and event:** \_\_\_\_\_

**Has your partner ever repressed/threatened you** emotionally  financially

**If yes, specify:** \_\_\_\_\_
